# Supplementary material
Source: publisher figshare collection journal article supplement (https://gsapubs.figshare.com/articles/dataset/_/13063679)
Supplement: Supplementary file 1 [file 1]

Qian W.L. Zhang, Jia-Hui Liu, Zhen M.G. Li, Meng-Yan Shi, Yi-Chao Chen, and Chun-Ming Wu, 2020, Juxtaposition of diverse, subduction-related tectonic blocks with contrasting metamorphic features and ages in the Paleoproterozoic Aketashitage orogen, NW China: Implications for Precambrian orogeny: GSA Bulletin, <https://doi.org/10.1130/B35766.1>.

## Supplemental Material

**Table S1.** Main mineral components and modal contents (vol%) of representative samples.

**Table S2.** Bulk-rock composition of representative samples.

**Table S3.** Summary chemical composition data of representative minerals.

**Table S4.** SIMS U-Pb geochronological data of monazite.

**Table S5.** SHRIMP U-Pb geochronological data of zircon.

**Table S6.** LA-ICP-MS U-Pb geochronological data of zircon.
